# Supplementary material
Source: Springer Nature journal article supplement (https://www.springermedizin.de/resource/supplementary/12875_2012_809_MOESM4_ESM.pdf/9435122)
Supplement: MOESM4 [file 9435122]

Third evaluation on quality of care & effectiveness of programme

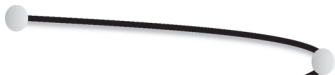

Feedback of results to Programme WG; review criteria & standards; action plan for improvement

Second evaluation on the standards of structure, process and outcome of care

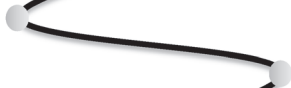

Feedback of results to Programme WG; review criteria & standards; action plan for improvement

First evaluation on the standards of structure, process and outcome of care

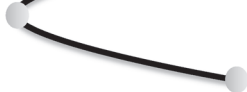

Programme WG and HKU evaluation team set target criteria & standards
